# Supplementary material for: Sphingolipids in Human Synovial Fluid - A Lipidomic Study
Source: PubMed Central journal article supplement (PMC3960152; doi:10.1371/journal.pone.0091769), 2014-03-19
Supplement: pone.0091769.s004.pdf [file pone.0091769.s004.pdf]

**Table S1.** Concentrations of lipid species presented in Figure 1-7.

| Lipid                 | Control (n=9)<br>[nmol/ml] | eOA (n=17)<br>[nmol/ml] | IOA (n=13)<br>[nmol/ml]  | RA (n=18) [nmol/ml]     |
|-----------------------|----------------------------|-------------------------|--------------------------|-------------------------|
| <b>SM 34:0</b>        | <b>0.45 (0.40-0.64)</b>    | <b>1.24 (0.80-1.32)</b> | <b>1.42 (1.26-3.85)</b>  | <b>1.71 (1.42-2.39)</b> |
|                       | 0.45 (0.40-0.64)           | 0.86 (0.78-1.35)        | 1.02 (0.94-1.20)         | 1.93 (1.58-2.56)        |
| <b>SM 36:0</b>        | <b>0.11 (0.06-0.13)</b>    | <b>0.16 (0.08-0.34)</b> | <b>0.34 (0.23-0.54)</b>  | <b>0.37 (0.25-0.52)</b> |
|                       | 0.11 (0.06-0.13)           | 0.15 (0.05-0.29)        | 0.23 (0.14-0.35)         | 0.40 (0.33-0.69)        |
| <b>SM 32:1</b>        | <b>1.08 (0.76-1.54)</b>    | <b>3.06 (1.83-4.60)</b> | <b>5.17 (3.58-11.5)</b>  | <b>5.42 (4.40-5.93)</b> |
|                       | 1.08 (0.76-1.54)           | 2.68 (1.18-4.68)        | 3.36 (2.96-3.59)         | 5.71 (4.91-6.52)        |
| <b>SM 33:1</b>        | <b>0.65 (0.48-0.89)</b>    | <b>1.48 (1.18-2.49)</b> | <b>2.16 (1.80-5.84)</b>  | <b>2.76 (2.65-3.16)</b> |
|                       | 0.65 (0.48-0.89)           | 1.25 (0.66-2.28)        | 1.61 (1.38-1.79)         | 3.30 (2.67-3.75)        |
| <b>SM 34:1</b>        | <b>17.0 (11.7-17.7)</b>    | <b>33.6 (23.4-52.8)</b> | <b>52.6 (36.5-112.7)</b> | <b>46.4 (41.8-58.6)</b> |
|                       | 17.0 (11.7-17.7)           | 28.9 (20.4-37.9)        | <b>30.3 (27.6-33.8)</b>  | 55.2 (47.0-65.8)        |
| <b>SM 35:1</b>        | <b>0.15 (0.12-0.17)</b>    | <b>0.33 (0.21-0.57)</b> | <b>0.60 (0.43-1.33)</b>  | <b>0.43 (0.37-0.55)</b> |
|                       | 0.15 (0.12-0.17)           | 0.34 (0.18-0.41)        | 0.36 (0.33-0.39)         | 0.50 (0.44-0.61)        |
| <b>SM 36:1</b>        | <b>2.13 (0.88-2.40)</b>    | <b>3.85 (2.95-7.60)</b> | <b>7.86 (5.08-12.9)</b>  | <b>8.24 (5.69-12.2)</b> |
|                       | 2.13 (0.88-2.40)           | 3.55 (2.38-5.25)        | 4.44 (3.62-5.22)         | 10.0 (7.53-12.6)        |
| <b>SM 38:1</b>        | <b>0.29 (0.15-0.54)</b>    | <b>0.90 (0.50-1.59)</b> | <b>1.92 (1.46-3.31)</b>  | <b>1.88 (0.99-3.96)</b> |
|                       | 0.29 (0.15-0.54)           | 1.04 (0.40-1.49)        | 1.40 (0.73-1.75)         | 2.48 (0.98-3.48)        |
| <b>SM 40:1</b>        | <b>0.77 (0.30-1.27)</b>    | <b>2.11 (1.64-4.23)</b> | <b>4.29 (3.14-8.88)</b>  | <b>4.71 (3.07-8.09)</b> |
|                       | 0.77 (0.30-1.27)           | 1.98 (1.22-3.50)        | 2.77 (2.06-3.11)         | 6.27 (3.78-7.74)        |
| <b>SM 42:1</b>        | <b>0.89 (0.65-1.33)</b>    | <b>2.71 (1.66-4.15)</b> | <b>3.99 (3.05-9.17)</b>  | <b>4.64 (3.62-6.70)</b> |
|                       | 0.89 (0.65-1.33)           | 2.17 (1.44-3.48)        | 2.65 (2.10-3.03)         | 5.61 (4.02-7.47)        |
| <b>SM 34:2</b>        | <b>2.18 (1.42-2.35)</b>    | <b>4.34 (3.11-7.47)</b> | <b>7.20 (5.28-13.8)</b>  | <b>6.02 (5.11-6.72)</b> |
|                       | 2.18 (1.42-2.35)           | 3.48 (2.71-5.40)        | 4.15 (3.68-4.68)         | 6.64 (5.99-7.91)        |
| <b>SM 35:2</b>        | <b>0.35 (0.25-0.47)</b>    | <b>0.78 (0.61-1.09)</b> | <b>1.20 (0.86-3.12)</b>  | <b>1.37 (1.17-1.58)</b> |
|                       | 0.35 (0.25-0.47)           | 0.65 (0.37-1.03)        | 0.76 (0.63-0.91)         | 1.56 (1.37-1.76)        |
| <b>SM 36:2</b>        | <b>0.99 (0.50-1.17)</b>    | <b>1.70 (1.47-3.15)</b> | <b>3.42 (2.14-4.99)</b>  | <b>3.43 (2.11-4.20)</b> |
|                       | 0.99 (0.50-1.17)           | 1.54 (1.12-2.38)        | 1.95 (1.59-2.29)         | 3.81 (3.16-4.34)        |
| <b>SM 38:2</b>        | <b>0.54 (0.27-0.56)</b>    | <b>0.91 (0.72-1.57)</b> | <b>1.66 (1.20-2.47)</b>  | <b>1.68 (1.05-1.99)</b> |
|                       | 0.54 (0.27-0.56)           | 0.73 (0.57-1.23)        | 0.98 (0.79-1.23)         | 1.88 (1.46-2.10)        |
| <b>SM 40:2</b>        | <b>1.51 (0.80-1.85)</b>    | <b>3.25 (2.15-5.92)</b> | <b>6.42 (4.11-10.6)</b>  | <b>6.22 (4.33-7.78)</b> |
|                       | 1.51 (0.80-1.85)           | 2.64 (1.88-4.12)        | 3.58 (2.77-4.17)         | 7.06 (5.64-8.24)        |
| <b>SM 42:2</b>        | <b>4.91 (3.46-5.87)</b>    | <b>10.4 (6.99-15.4)</b> | <b>16.5 (11.7-33.0)</b>  | <b>16.7 (13.3-21.0)</b> |
|                       | 4.91 (3.46-5.87)           | 8.81 (6.00-13.9)        | 9.52 (8.65-11.6)         | 18.8 (14.4-25.4)        |
| <b>SM 40:3</b>        | <b>0.18 (0.16-0.24)</b>    | <b>0.33 (0.16-0.54)</b> | <b>0.54 (0.38-1.07)</b>  | <b>0.66 (0.50-0.86)</b> |
|                       | 0.18 (0.16-0.24)           | 0.22 (0.13-0.57)        | 0.38 (0.20-0.51)         | 0.74 (0.56-0.90)        |
| <b>SM 42:3</b>        | <b>3.21 (2.12-3.32)</b>    | <b>5.79 (4.19-9.21)</b> | <b>10.1 (6.17-17.9)</b>  | <b>8.63 (6.47-10.2)</b> |
|                       | 3.21 (2.12-3.32)           | 4.77 (3.49-7.36)        | 5.43 (4.66-5.93)         | 10.4 (7.28-11.2)        |
| <b>SM 42:4</b>        | <b>0.28 (0.19-0.46)</b>    | <b>0.51 (0.34-0.86)</b> | <b>0.54 (0.48-2.00)</b>  | <b>0.64 (0.42-0.70)</b> |
|                       | 0.28 (0.19-0.46)           | 0.45 (0.28-0.64)        | 0.43 (0.42-0.51)         | 0.72 (0.57-0.79)        |
|                       |                            |                         |                          |                         |
| <b>Cer d18:1/16:0</b> | <b>0.21 (0.17-0.33)</b>    | <b>0.32 (0.22-0.47)</b> | <b>0.45 (0.34-1.08)</b>  | <b>0.54 (0.43-0.70)</b> |
|                       | 0.21 (0.17-0.33)           | 0.26 (0.17-0.38)        | 0.28 (0.24-0.35)         | 0.61 (0.53-0.74)        |
| <b>Cer d18:1/18:0</b> | <b>0.06 (0.05-0.10)</b>    | <b>0.08 (0.06-0.10)</b> | <b>0.09 (0.05-0.31)</b>  | <b>0.08 (0.06-0.10)</b> |
|                       | 0.06 (0.05-0.10)           | 0.06 (0.05-0.08)        | 0.05 (0.04-0.06)         | 0.10 (0.07-0.11)        |

|                                      |                           |                            |                             |                              |
|--------------------------------------|---------------------------|----------------------------|-----------------------------|------------------------------|
| <b>Cer d18:1/22:0</b>                | <b>0.12 (0.08-0.15)</b>   | <b>0.17 (0.11-0.30)</b>    | <b>0.28 (0.23-0.53)</b>     | <b>0.35 (0.21-0.51)</b>      |
|                                      | 0.12 (0.08-0.15)          | 0.13 (0.09-0.20)           | 0.18 (0.16-0.22)            | 0.45 (0.33-0.49)             |
| <b>Cer d18:1/23:0</b>                | <b>0.17 (0.16-0.24)</b>   | <b>0.32 (0.17-0.44)</b>    | <b>0.39 (0.32-0.92)</b>     | <b>0.56 (0.36-0.72)</b>      |
|                                      | 0.17 (0.16-0.24)          | 0.24 (0.15-0.33)           | 0.25 (0.22-0.35)            | 0.69 (0.48-0.85)             |
| <b>Cer d18:1/24:0</b>                | <b>0.31 (0.28-0.39)</b>   | <b>0.72 (0.47-1.26)</b>    | <b>1.23 (1.04-2.24)</b>     | <b>1.54 (0.99-2.08)</b>      |
|                                      | 0.31 (0.28-0.39)          | 0.60 (0.41-1.08)           | 0.74 (0.58-1.02)            | 1.97 (1.33-2.15)             |
| <b>Cer d18:1/24:1</b>                | <b>0.38 (0.34-0.46)</b>   | <b>0.61 (0.43-0.95)</b>    | <b>0.93 (0.64-1.60)</b>     | <b>1.10 (0.82-1.32)</b>      |
|                                      | 0.38 (0.34-0.46)          | 0.45 (0.33-0.69)           | 0.62 (0.46-0.71)            | 1.22 (1.03-1.38)             |
|                                      |                           |                            |                             |                              |
| <b>HexCer d18:1/16:0</b>             | <b>57.4 (43.1-74.1)</b>   | <b>132.4 (86.6-239.1)</b>  | <b>202.6 (168.1-351.3)</b>  | <b>364.3 (262.5-418.6)</b>   |
|                                      | 57.4 (43.1-74.1)          | 126.9 (71.4-210.4)         | 132.6 (101.0-183.6)         | 411.6 (301.0-526.3)          |
| <b>HexCer d18:1/22:0</b>             | <b>56.6 (33.8-94.0)</b>   | <b>198.1 (114.1-321.2)</b> | <b>220.2 (198.1-479.9)</b>  | <b>326.6 (226.5-377.1)</b>   |
|                                      | 56.6 (33.8-94.0)          | 168.7 (87.4-263.6)         | 143.8 (121.3-223.1)         | 366.1 (282.8-495.2)          |
| <b>HexCer d18:1/23:0</b>             | <b>25.8 (17.1-45.4)</b>   | <b>95.0 (55.5-156.7)</b>   | <b>126.9 (105.7-251.3)</b>  | <b>188.4 (128.7-229.2)</b>   |
|                                      | 25.8 (17.1-45.4)          | 86.3 (47.2-142.1)          | 77.7 (57.2-124.9)           | 219.1 (160.0-276.7)          |
| <b>HexCer d18:1/24:0</b>             | <b>83.8 (54.7-151.5)</b>  | <b>305.8 (172.6-465.8)</b> | <b>345.6 (300.8-683.2)</b>  | <b>510.1 (398.0-687.4)</b>   |
|                                      | 83.8 (54.7-151.5)         | 274.0 (150.2-381.0)        | 238.7 (178.7-328.6)         | 622.9 (424.6-816.3)          |
| <b>HexCer d18:1/24:1</b>             | <b>114.3 (82.1-141.1)</b> | <b>282.6 (145.5-472.7)</b> | <b>397.2 (282.6-609.7)</b>  | <b>546.9 (358.5-702.1)</b>   |
|                                      | 114.3 (82.1-141.1)        | 256.6 (139.5-412.6)        | 250.5 (205.9-314.7)         | 660.4 (445.2-877.0)          |
|                                      |                           |                            |                             |                              |
| <b>Hex<sub>2</sub>Cer d18:1/16:0</b> | <b>186.8 (85.6-262.2)</b> | <b>432.4 (297.4-572.0)</b> | <b>511.1 (364.3-1199.8)</b> | <b>1189.3 (788.0-1328.1)</b> |
|                                      | 186.8 (85.6-262.2)        | 433.2 (250.5-673.8)        | 377.2 (266.4-491.5)         | 1465.4 (997.0-1720.2)        |
| <b>Hex<sub>2</sub>Cer d18:1/22:0</b> | <b>16.5 (7.60-18.8)</b>   | <b>28.2 (23.9-50.5)</b>    | <b>31.4 (24.5-76.1)</b>     | <b>77.9 (43.3-92.0)</b>      |
|                                      | 16.5 (7.60-18.8)          | 27.1 (20.4-44.5)           | 27.1 (17.4-35.1)            | 86.1 (64.2-108.4)            |
| <b>Hex<sub>2</sub>Cer d18:1/23:0</b> | <b>4.55 (0.79-5.10)</b>   | <b>9.89 (7.15-17.1)</b>    | <b>10.7 (7.08-19.2)</b>     | <b>20.4 (12.2-23.8)</b>      |
|                                      | 4.55 (0.79-5.10)          | 10.3 (6.24-14.7)           | 7.54 (5.06-12.0)            | 26.4 (14.5-28.5)             |
| <b>Hex<sub>2</sub>Cer d18:1/24:0</b> | <b>16.1 (12.0-19.5)</b>   | <b>38.4 (25.5-49.9)</b>    | <b>39.6 (30.1-94.3)</b>     | <b>100.1 (56.1-117.9)</b>    |
|                                      | 16.1 (12.0-19.5)          | 33.8 (24.5-67.0)           | 28.6 (21.5-41.2)            | 122.2 (93.2-142.2)           |
| <b>Hex<sub>2</sub>Cer d18:1/24:1</b> | <b>64.3 (35.8-90.3)</b>   | <b>126.0 (96.8-167.4)</b>  | <b>151.9 (99.8-314.6)</b>   | <b>329.6 (281.9-437.1)</b>   |
|                                      | 64.3 (35.8-90.3)          | 119.5 (79.8-198.3)         | 108.6 (65.6-142.3)          | 450.9 (351.2-597.5)          |
|                                      |                           |                            |                             |                              |
| <b>PA 34:1</b>                       | <b>0.37 (0.18-0.50)</b>   | <b>0.54 (0.36-1.29)</b>    | <b>1.08 (0.82-2.11)</b>     | <b>1.19 (0.78-1.54)</b>      |
|                                      | 0.37 (0.18-0.50)          | 0.61 (0.34-0.88)           | 0.61 (0.49-1.04)            | 1.33 (1.08-1.91)             |
| <b>PA 36:1</b>                       | <b>0.15 (0.06-0.22)</b>   | <b>0.23 (0.17-0.49)</b>    | <b>0.46 (0.27-0.78)</b>     | <b>0.83 (0.56-1.45)</b>      |
|                                      | 0.15 (0.06-0.22)          | 0.22 (0.16-0.33)           | 0.25 (0.18-0.37)            | 1.16 (0.71-1.58)             |
| <b>PA 36:2</b>                       | <b>0.27 (0.11-0.35)</b>   | <b>0.47 (0.27-1.42)</b>    | <b>1.14 (0.69-1.80)</b>     | <b>1.24 (0.78-1.63)</b>      |
|                                      | 0.27 (0.11-0.35)          | 0.46 (0.25-0.96)           | 0.59 (0.48-0.79)            | 1.47 (1.22-2.16)             |
| <b>PA 38:4</b>                       | <b>0.03 (0.00-0.10)</b>   | <b>0.16 (0.00-0.42)</b>    | <b>0.22 (0.18-0.47)</b>     | <b>0.35 (0.22-0.47)</b>      |
|                                      | 0.03 (0.00-0.10)          | 0.14 (0.00-0.29)           | 0.17 (0.12-0.23)            | 0.43 (0.25-0.56)             |
|                                      |                           |                            |                             |                              |
| <b>LPA 16:0</b>                      | <b>0.27 (0.07-0.54)</b>   | <b>0.71 (0.50-1.70)</b>    | <b>1.37 (0.93-2.49)</b>     | <b>1.26 (0.87-2.78)</b>      |
|                                      | 0.27 (0.07-0.54)          | 0.64 (0.46-1.27)           | 0.89 (0.61-1.45)            | 1.64 (1.22-3.43)             |
| <b>LPA 18:0</b>                      | <b>0.10 (0.00-0.11)</b>   | <b>0.18 (0.08-0.37)</b>    | <b>0.20 (0.13-0.33)</b>     | <b>0.25 (0.16-0.44)</b>      |
|                                      | 0.10 (0.00-0.11)          | 0.12 (0.10-0.28)           | 0.16 (0.08-0.24)            | 0.31 (0.22-0.56)             |

|                      |                         |                         |                         |                         |
|----------------------|-------------------------|-------------------------|-------------------------|-------------------------|
| <b>LPA 18:1</b>      | <b>0.31 (0.08-0.41)</b> | <b>0.45 (0.32-1.18)</b> | <b>0.87 (0.52-1.17)</b> | <b>0.75 (0.52-1.17)</b> |
|                      | 0.31 (0.08-0.41)        | 0.40 (0.30-0.88)        | 0.46 (0.31-0.82)        | 0.82 (0.75-1.33)        |
| <b>LPA 18:2</b>      | <b>0.87 (0.15-2.22)</b> | <b>2.36 (1.80-7.09)</b> | <b>5.21 (2.44-6.34)</b> | <b>3.34 (1.61-4.94)</b> |
|                      | 0.87 (0.15-2.22)        | 2.75 (1.82-6.76)        | 2.57 (1.31-3.63)        | 3.97 (2.94-5.33)        |
| <b>LPA 20:4</b>      | <b>2.84 (1.19-5.02)</b> | <b>5.11 (3.66-10.7)</b> | <b>9.46 (5.24-11.8)</b> | <b>7.22 (4.40-10.7)</b> |
|                      | 2.84 (1.19-5.02)        | 4.72 (4.01-7.24)        | 5.37 (2.86-8.26)        | 8.18 (6.67-12.3)        |
|                      |                         |                         |                         |                         |
| <b>PG 34:1</b>       | <b>0.22 (0.09-0.44)</b> | <b>0.42 (0.33-0.54)</b> | <b>0.58 (0.31-1.43)</b> | <b>0.80 (0.58-0.92)</b> |
|                      | 0.22 (0.09-0.44)        | 0.43 (0.33-0.49)        | 0.40 (0.30-0.44)        | 0.92 (0.68-1.16)        |
| <b>PG 36:1</b>       | <b>0.18 (0.10-0.24)</b> | <b>0.48 (0.37-0.53)</b> | <b>0.48 (0.36-1.27)</b> | <b>0.72 (0.53-0.98)</b> |
|                      | 0.18 (0.10-0.24)        | 0.39 (0.34-0.54)        | 0.39 (0.27-0.46)        | 0.88 (0.69-1.20)        |
| <b>PG 36:2</b>       | <b>0.34 (0.29-0.49)</b> | <b>0.66 (0.43-0.76)</b> | <b>0.68 (0.43-2.66)</b> | <b>0.80 (0.65-0.90)</b> |
|                      | 0.34 (0.29-0.49)        | 0.61 (0.51-0.66)        | 0.54 (0.48-0.61)        | 1.01 (0.78-1.17)        |
| <b>PG 36:3</b>       | <b>0.00 (0.00-0.08)</b> | <b>0.15 (0.11-0.19)</b> | <b>0.12 (0.05-0.15)</b> | <b>0.20 (0.16-0.23)</b> |
|                      | 0.00 (0.00-0.08)        | 0.15 (0.12-0.16)        | 0.10 (0.07-0.13)        | 0.23 (0.19-0.29)        |
| <b>PG 38:4</b>       | <b>0.00 (0.00-0.00)</b> | <b>0.08 (0.00-0.14)</b> | <b>0.05 (0.00-0.11)</b> | <b>0.14 (0.10-0.15)</b> |
|                      | 0.00 (0.00-0.00)        | 0.11 (0.00-0.12)        | 0.06 (0.00-0.09)        | 0.17 (0.13-0.27)        |
|                      |                         |                         |                         |                         |
| <b>LPG 16:0</b>      | <b>0.28 (0.05-0.44)</b> | <b>0.29 (0.22-0.51)</b> | <b>0.34 (0.10-0.66)</b> | <b>0.45 (0.36-0.52)</b> |
|                      | 0.28 (0.05-0.44)        | 0.30 (0.22-0.37)        | 0.28 (0.12-0.46)        | 0.53 (0.41-0.67)        |
| <b>LPG 18:1</b>      | <b>1.69 (0.96-2.44)</b> | <b>1.43 (1.05-1.73)</b> | <b>1.82 (1.00-2.50)</b> | <b>1.21 (1.06-1.56)</b> |
|                      | 1.69 (0.96-2.44)        | 1.20 (1.07-1.67)        | 1.11 (1.00-1.34)        | 1.50 (1.27-1.75)        |
|                      |                         |                         |                         |                         |
| <b>SPH d18:0</b>     | <b>0.00 (0.00-0.00)</b> | <b>0.00 (0.00-0.00)</b> | <b>0.00 (0.00-0.00)</b> | <b>11.8 (0.00-47.6)</b> |
|                      | 0.00 (0.00-0.00)        | 0.00 (0.00-0.00)        | 0.00 (0.00-0.00)        | 0.00 (0.00-68.2)        |
| <b>SPH d18:1</b>     | <b>0.00 (0.00-0.00)</b> | <b>0.00 (0.00-0.00)</b> | <b>0.00 (0.00-0.00)</b> | <b>27.3 (18.3-40.2)</b> |
|                      | 0.00 (0.00-0.00)        | 0.00 (0.00-0.00)        | 0.00 (0.00-0.00)        | 39.4 (27.0-55.5)        |
|                      |                         |                         |                         |                         |
| <b>SPC d18:0</b>     | <b>0.00 (0.00-0.00)</b> | <b>0.00 (0.00-0.00)</b> | <b>0.00 (0.00-0.00)</b> | <b>0.00 (0.00-1.79)</b> |
|                      | 0.00 (0.00-0.00)        | 0.00 (0.00-0.00)        | 0.00 (0.00-0.00)        | 0.00 (0.00-2.32)        |
| <b>SPC d18:1</b>     | <b>0.00 (0.00-1.66)</b> | <b>7.49 (0.00-17.5)</b> | <b>9.35 (4.30-12.3)</b> | <b>16.1 (10.8-31.2)</b> |
|                      | 0.00 (0.00-1.66)        | 8.44 (0.00-12.8)        | 8.82 (5.02-9.81)        | 21.1 (11.6-50.1)        |
|                      |                         |                         |                         |                         |
| <b>CL 36:4/36:4</b>  | <b>0.00 (0.00-0.00)</b> | <b>0.00 (0.00-0.00)</b> | <b>0.00 (0.00-0.00)</b> | <b>0.02 (0.01-0.03)</b> |
|                      | 0.00 (0.00-0.00)        | 0.00 (0.00-0.00)        | 0.00 (0.00-0.00)        | 0.02 (0.01-0.03)        |
|                      |                         |                         |                         |                         |
| <b>BMP 18:1/18:1</b> | <b>0.37 (0.23-0.62)</b> | <b>0.31 (0.21-0.50)</b> | <b>0.49 (0.31-1.00)</b> | <b>0.32 (0.26-0.41)</b> |
|                      | 0.37 (0.23-0.62)        | 0.33 (0.21-0.46)        | 0.30 (0.25-0.42)        | 0.42 (0.33-0.53)        |
| <b>BMP 18:1/18:2</b> | <b>0.21 (0.12-0.27)</b> | <b>0.22 (0.15-0.34)</b> | <b>0.34 (0.21-0.62)</b> | <b>0.25 (0.19-0.31)</b> |
|                      | 0.21 (0.12-0.27)        | 0.22 (0.12-0.33)        | 0.21 (0.18-0.25)        | 0.30 (0.24-0.39)        |

Lipids were determined by electrospray ionization tandem mass spectrometry or liquid chromatography coupled with tandem mass spectrometry as outlined in *Material and*

*Methods.* Data (nmol/ml or pmol/ml) obtained were either uncorrected (normal font) or corrected with the dilution factor per Kraus *et al.* (34, bold font). Values are median and interquartile range. The concentrations of urea were determined within serum and SF to calculate a dilution factor for SF; this procedure was formerly developed to adjust for the dilution introduced by lavage during some biomarker studies. eOA-early osteoarthritis, IOA-late osteoarthritis, RA-rheumatoid arthritis, SM-sphingomyelin, Cer-ceramide, HexCer-hexosylceramide (most likely glucosylceramide), Hex<sub>2</sub>Cer-dihexosylceramide (most likely lactosylceramide), PA-phosphatidic acid, LPA-lysophosphatidic acid, PG-phosphatidylglycerol, LPG-lysophosphatidylglycerol, SPH-sphingosine, SPC-sphingosylphosphorylcholine, CL-cardiolipin, BMP-bis(monoglycero)phosphate.
